# Supplementary material for: Maternal and Peer Regulation of Adolescent Emotion: Associations with Depressive Symptoms
Source: Springer Nature journal article supplement (doi:10.1007/s10802-015-0084-x), 2015-09-30
Supplement: MOESM1 [file 824794]

| *Demographic Characteristics of the Sample.* | | |
| --- | --- | --- |
|  | *n* | Percentage |
| Ethnicity |  |  |
| European-Canadian | 63 | 76 |
| Other | 4 | 5 |
| Asian-Canadian | 6 | 7 |
| Latin American-Canadian | 3 | 4 |
| African/Caribbean-Canadian | 3 | 4 |
| South Asian-Canadian | 3 | 4 |
| Middle Eastern-Canadian | 1 | 1 |
| Mothers’ Education Level |  |  |
| Some high school | 2 | 2 |
| Graduated high school | 13 | 16 |
| Graduated community college or technical school | 14 | 17 |
| Graduated university | 26 | 31 |
| Post-grad or professional degree | 23 | 28 |
| Do not know | 5 | 6 |
| Fathers’ Education Level |  |  |
| Some high school | 3 | 4 |
| Graduated high school | 5 | 6 |
| Graduated community college or technical school | 10 | 12 |
| Graduated university | 30 | 36 |
| Post-grad or professional degree | 30 | 36 |
| Do not know | 5 | 6 |
| Adolescent Sex |  |  |
| Male | 31 | 37 |
| Female | 52 | 63 |
| Adolescent Age (years) |  |  |
| 16 | 57 | 69 |
| 17 | 26 | 31 |
